# Supplementary material for: CRISPR-Cas9 induces large structural variants at on-target and off-target sites in vivo that segregate across generations
Source: Springer Nature journal article supplement (doi:10.1038/s41467-022-28244-5), 2022-02-02
Supplement: 41467_2022_28244_MOESM1_ESM.pdf [file 41467_2022_28244_MOESM1_ESM.pdf]

Supplementary Material: CRISPR-Cas9 induces large structural variants at on-target and off-target sites *in vivo* that segregate across generations

Ida Höijer, Anastasia Emmanouilidou, Rebecka Östlund, Robin van Schendel, Selma Bozorgpana, Marcel Tijsterman, Lars Feuk, Ulf Gyllensten, Marcel den Hoed, Adam Ameer

## Supplementary Figures

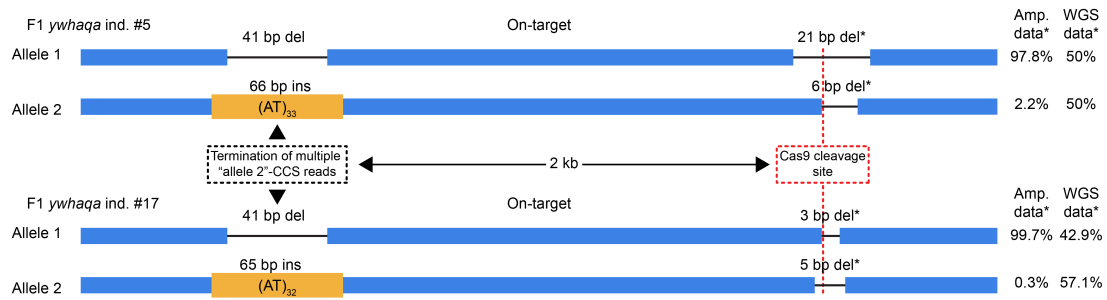

**Supplementary Figure S1.** Schematic figure showing the two different alleles at the on-target site in F1 *ywahaqa* individual #5 and #17. Nanopore WGS data demonstrates that the two individuals are heterozygous, with alleles 1 and 2 detected at similar frequencies. In both samples, allele 2 is heavily underrepresented in the PacBio amplicon data. A 65-66 bp insertion, consisting of an AT-dinucleotide repeat was found in allele 2 in both samples. In the PacBio amplicon data, for both samples, several CCS reads representing allele 2 terminated at this repeat insertion site.

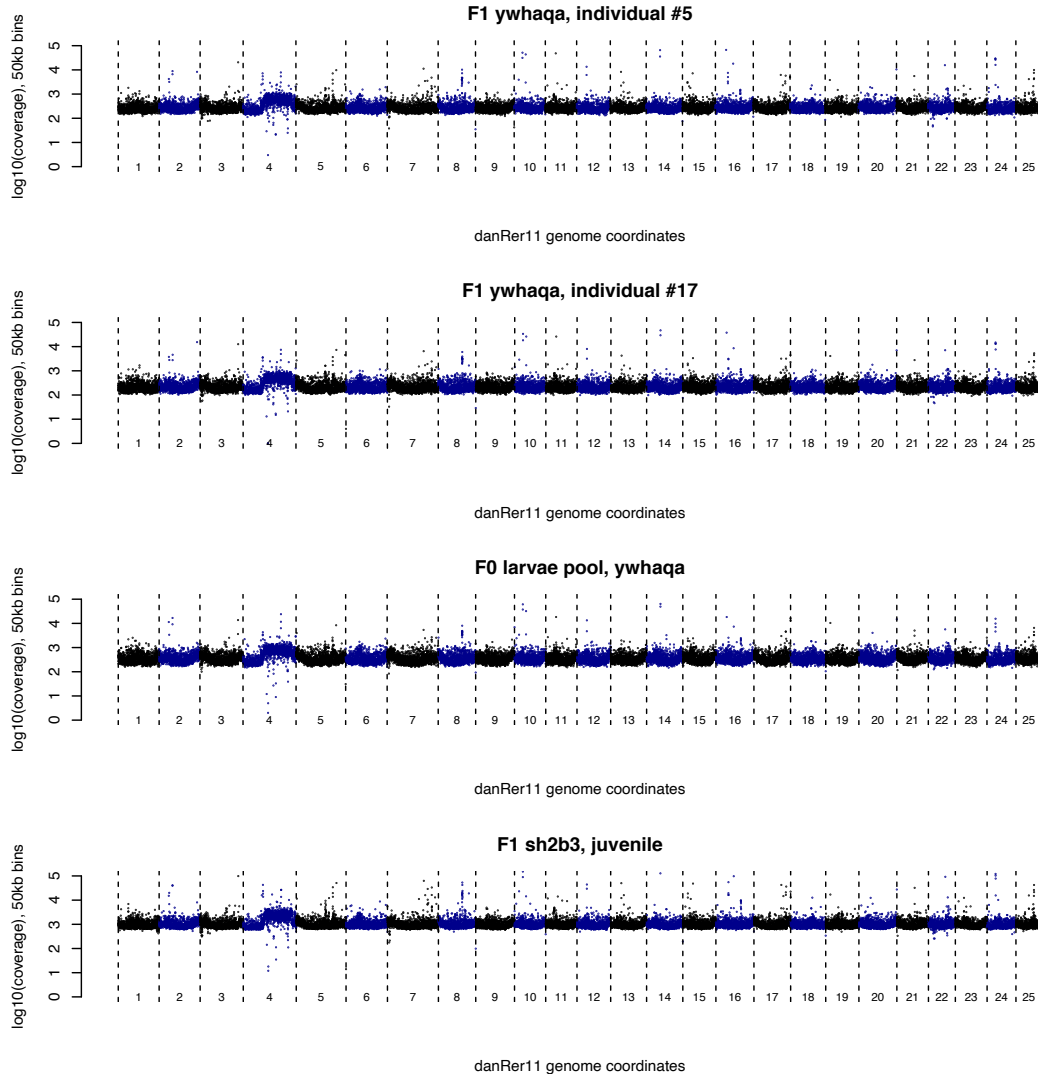

**Supplementary Figure S2.** Coverage distribution of nanopore whole genome sequencing data for four zebrafish samples. Each point represents the coverage in a 50 kb window. No large-scale chromosomal aberrations are observable for the F1 individuals #5 and #17 on chromosome 20, i.e., the chromosome where the *ywahaq* on-target site is located. For comparison, nanopore WGS data was generated also for a *ywahaq* F0 larvae pool as well as a *sh2b3* F1 individual. All four samples display a similar coverage pattern and there are no indications of large copy number variants (CNVs) being induced by CRISPR-Cas9 in these samples. A potential copy number gain signal is seen on chromosome 4, but since it occurs in all samples this signal is likely caused by general sequence differences when comparing the zebrafish samples to the GRCz11 reference.

## Supplementary Tables

**Supplementary Table S1.** Sequences for all 23 gRNAs used in this study.

| <b>gRNA name</b> | <b>gRNA sequence</b> |
|------------------|----------------------|
| apoba            | GGGGAGGGCTCTATCTTAGG |
| apobb.1          | GGAGCTGACAAAGTACCAAG |
| apobb.2          | GGATTAGCTGAGCAAGAGGA |
| apoc2            | GGGTGTACATACCCAGTGCA |
| apoea            | GGCTCTCTCTGCGCGTAAG  |
| apoeb            | GAGGGGCATCAGCCTGGAAC |
| gckr             | GGCATGTGTATTATCTGGGA |
| hcn4             | GGAGAGCCCTCCTGGAGCCG |
| hcn4l            | GGCCTGGATAGTGTTTAACG |
| insra            | GGGACAGAGGCCAGCACAAG |
| insrb            | GACCAACATCACGCGGGGAG |
| kcnv2a           | GAGGAAACGCGTATGCCCAA |
| ldlra            | GATTCACGGCAGTATCAGTG |
| ldlrb            | GGAGCGGATTCTGCGAGCGG |
| lipca            | GGGTTCTCCAGACATAGCT  |
| mmp20a           | GGGATGAAAGAGGCAAGATG |
| nbeal2           | GGTCCCCTTCTCCCAAGG   |
| neo1a            | GGAGCCGTCGGATACTAG   |
| neo1b            | GGACAGAGATGCTCGGCCTG |
| pcsk9            | GGCAGTAAAGTTGCCCATG  |
| sh2b3            | GGGAGCGCTGGAATCCATGG |
| vldlr            | GAGCAGTCTCAGTTCCAGTG |
| ywhaqa           | GGCGCCTACAAGAACGTGGT |

**Supplementary Table S2.** Cas9 cleavage sites *in vitro* for 23 gRNAs, detected by the Nano-OTS method. Coordinates and sequences are obtained from the GRCz11 zebrafish reference genome.

| chr   | position | gRNAname | gDNAsequence             | alignSimilarity | alignScore | snvBases | indelBases | peakHeight |
|-------|----------|----------|--------------------------|-----------------|------------|----------|------------|------------|
| chr17 | 30718007 | apoba    | TGGGAGGGCTCTATCTTAGGGGG  | 21/80 (26.2%)   | 99         | 1        | 0          | 192        |
| chr14 | 40455513 | apoba    | CCGCCTATGATAGACCCCTAATT  | 17/80 (21.2%)   | 63         | 5        | 0          | 111        |
| chr22 | 36284098 | apoba    | GGGGAAGGCAGTATCTTAGGGGG  | 19/80 (23.8%)   | 81         | 3        | 0          | 85         |
| chr20 | 31273933 | apobb1   | GCAGCTGACAAAGTACCAAGGGG  | 21/80 (26.2%)   | 99         | 1        | 0          | 65         |
| chr22 | 4914510  | apobb1   | CCTCTTGGTCTTTGTACAGCTCT  | 20/80 (25.0%)   | 70         | 2        | 1          | 23         |
| chr20 | 53444334 | apobb2   | CCATCCTCTTGCTCAGCTAATCA  | 21/80 (26.2%)   | 99         | 1        | 0          | 87         |
| chr2  | 47454801 | apobb2   | CCCTCCTCTTGCTGCTACTCT    | 19/80 (23.8%)   | 81         | 3        | 0          | 24         |
| chr16 | 23985170 | apoc2    | CCTTGCACTGGGTATGTACACAC  | 21/80 (26.2%)   | 99         | 1        | 0          | 122        |
| chr19 | 10856069 | apoea    | CCCCTTACGCGCAGGAGAGGCC   | 22/80 (27.5%)   | 108        | 0        | 0          | 116        |
| chr16 | 23961550 | apoeb    | CCTGTTCCAGGCTGATGCCCTC   | 22/80 (27.5%)   | 108        | 0        | 0          | 209        |
| chr17 | 5878029  | gckr     | CCATCCAGATAATACATGCG     | 21/80 (26.2%)   | 99         | 1        | 0          | 411        |
| chr23 | 30916318 | gckr     | TGTTTGTGTATTATCTGAAAGG   | 18/80 (22.5%)   | 72         | 4        | 0          | 132        |
| chr1  | 21357140 | gckr     | CCTTCTCAGATGATGCACATGCA  | 18/80 (22.5%)   | 72         | 4        | 0          | 60         |
| chr21 | 23319983 | gckr     | CCAACCCAGATAATACACCACTT  | 16/80 (20.0%)   | 54         | 6        | 0          | 31         |
| chr3  | 21773503 | gckr     | CCGTCCAGATGATATAACAAT    | 16/80 (20.0%)   | 54         | 6        | 0          | 31         |
| chr6  | 44274257 | gckr     | TCTGTGTGTATTATCTGGGGACG  | 16/80 (20.0%)   | 54         | 6        | 0          | 19         |
| chr19 | 11525479 | gckr     | GACATGTATTTTATTT-----    | 12/87 (13.8%)   | 44         | 4        | -1         | 10         |
| chr21 | 16260203 | gckr     | ACACCCAGACAGCACACATACG   | 15/80 (18.8%)   | 45         | 7        | 0          | 10         |
| chr11 | 32265767 | gckr     | CCAACCCAGATAATACACCATAA  | 16/80 (20.0%)   | 54         | 6        | 0          | 8          |
| chr4  | 32765162 | gckr     | ACTGCCAGACAGCACACATACG   | 15/80 (18.8%)   | 45         | 7        | 0          | 8          |
| chr5  | 671631   | gckr     | CACTCCAGAATGTACACATGCT   | 17/80 (21.2%)   | 63         | 5        | 0          | 5          |
| chr14 | 48008478 | gckr     | -----CGGAGAAAACCCATGCG   | 12/86 (14.0%)   | 40         | 5        | -1         | 4          |
| chr18 | 1143644  | hcn4     | CCGCGGCTCCAGGAGGGCTCTCC  | 22/80 (27.5%)   | 108        | 0        | 0          | 31         |
| chr25 | 29273090 | hcn4l    | CCACGTAAACACTATCCAGGCG   | 21/80 (26.2%)   | 99         | 1        | 0          | 19         |
| chr11 | 34856421 | hcn4l    | CCGAGTTAAACACTATCCCAAC   | 17/80 (21.2%)   | 63         | 5        | 0          | 9          |
| chr2  | 37570139 | insra    | GGGACAGAGGCCAGCACAAAGGGG | 22/80 (27.5%)   | 108        | 0        | 0          | 147        |
| chr4  | 54914411 | insra    | GGGGGAGGGGGCAGTCCA----   | 13/84 (15.5%)   | 41         | 6        | -1         | 93         |
| chr4  | 8537670  | insra    | CCGCTTGTGTGGCCTCTGACTC   | 19/80 (23.8%)   | 81         | 3        | 0          | 88         |
| chr23 | 14699329 | insra    | TGAACCGCTGCCTGCACAAGCTG  | 15/80 (18.8%)   | 45         | 7        | 0          | 10         |
| chr9  | 8529080  | insra    | GGAACACAGGCGGACACAAGTGC  | 16/80 (20.0%)   | 54         | 6        | 0          | 8          |
| chr22 | 11004684 | insrb    | CCGCTCCCCGCTGATGTTGGTC   | 22/80 (27.5%)   | 108        | 0        | 0          | 121        |
| chr14 | 15606594 | insrb    | GAGCCCCATCGGGGGGGGGGGG   | 15/80 (18.8%)   | 45         | 7        | 0          | 85         |
| chr10 | 15311488 | kcnv2a   | CCTTTGGGCATACGCTTTCCTC   | 22/80 (27.5%)   | 108        | 0        | 0          | 19         |
| chr3  | 19304777 | ldlra    | GATTCACGGCAGTATCAGTGTGG  | 22/80 (27.5%)   | 108        | 0        | 0          | 143        |
| chr23 | 8189813  | ldlra    | CCCCACTGAACTGCCGTGACT    | 18/80 (22.5%)   | 72         | 4        | 0          | 32         |
| chr16 | 9332405  | ldlra    | GCATAACGGCTGTATCAGTGTGG  | 18/80 (22.5%)   | 72         | 4        | 0          | 24         |
| chr10 | 36351898 | ldlra    | CCTTACTGATACTGCAGTGAAC   | 19/80 (23.8%)   | 81         | 3        | 0          | 16         |
| chr19 | 25977945 | ldlra    | CCTCACTGATGTTGTCGTAATG   | 18/80 (22.5%)   | 72         | 4        | 0          | 14         |
| chr24 | 7925197  | ldlra    | CACTCACAGCAGTAACAGTGTGG  | 18/80 (22.5%)   | 72         | 4        | 0          | 8          |

|       |          |        |                         |               |     |   |   |     |
|-------|----------|--------|-------------------------|---------------|-----|---|---|-----|
| chr7  | 30398243 | lipca  | CCTAGCTATGTCTGGGAGAACCC | 22/80 (27.5%) | 108 | 0 | 0 | 64  |
| chr15 | 25555212 | mmp20a | CCACATCTTGCTCTTTCATCCC  | 22/80 (27.5%) | 108 | 0 | 0 | 35  |
| chr16 | 16478569 | nbeal2 | CCTCCTTGGGGAGAAGGGGGACA | 21/80 (26.2%) | 99  | 1 | 0 | 106 |
| chr12 | 24373304 | nbeal2 | CGGCCCCCTCTCCCAAAGGGGG  | 18/80 (22.5%) | 72  | 4 | 0 | 88  |
| chr8  | 47074469 | nbeal2 | CCACCTTGGGGGAAAGGAGATT  | 17/80 (21.2%) | 63  | 5 | 0 | 71  |
| chr14 | 16385238 | nbeal2 | CCCCTTGGGGAAATGGGGTGT   | 16/80 (20.0%) | 54  | 6 | 0 | 67  |
| chr19 | 44806008 | nbeal2 | CCACCTTGGGGAGAAGCGGGGCA | 19/80 (23.8%) | 81  | 3 | 0 | 57  |
| chr24 | 13828273 | nbeal2 | CACACTTGGGGAGCAGGGGGCCT | 17/80 (21.2%) | 63  | 5 | 0 | 56  |
| chr18 | 14204547 | nbeal2 | GCACCCCTTTCACCCAGGCGG   | 17/80 (21.2%) | 63  | 5 | 0 | 35  |
| chr10 | 1890600  | nbeal2 | GGTCCACCATCTTCCAAGGAGG  | 19/80 (23.8%) | 81  | 3 | 0 | 32  |
| chr3  | 35685641 | nbeal2 | ATACCCCTTACCCCAAGGGGG   | 16/80 (20.0%) | 54  | 6 | 0 | 22  |
| chr20 | 24396692 | nbeal2 | CCCCTTGGGGGATGGGGTGGG   | 15/80 (18.8%) | 45  | 7 | 0 | 19  |
| chr6  | 23360436 | nbeal2 | CGTCCCCTGTCTCCCAAGGCGG  | 20/80 (25.0%) | 70  | 2 | 1 | 14  |
| chr14 | 11142437 | nbeal2 | CCACCTGGGGGGATGGGGGAG   | 16/80 (20.0%) | 54  | 6 | 0 | 11  |
| chr18 | 30359856 | nbeal2 | CCCCTTGGGGAGAGGGTTCATA  | 16/80 (20.0%) | 54  | 6 | 0 | 6   |
| chr5  | 13924978 | nbeal2 | CCACCTTGGGATATGGGGGAAC  | 18/80 (22.5%) | 72  | 4 | 0 | 5   |
| chr7  | 53879247 | neo1a  | GGAGCCGTCGGATACTAGCGG   | 22/80 (27.5%) | 108 | 0 | 0 | 70  |
| chr2  | 33150097 | neo1a  | CCTTAGTGTATCAGGCGCTCT   | 18/80 (22.5%) | 72  | 4 | 0 | 6   |
| chr25 | 2899718  | neo1b  | GGACAGAGATGCTCGGCTGTGG  | 22/80 (27.5%) | 108 | 0 | 0 | 36  |
| chr20 | 7399763  | pcsk9  | GGCAGTAAAGTTGCCCATGTGG  | 22/80 (27.5%) | 108 | 0 | 0 | 226 |
| chr20 | 19914504 | pcsk9  | CAACAAGGATCAACATTAGTGA  | 14/80 (17.5%) | 40  | 7 | 0 | 29  |
| chr14 | 18273989 | pcsk9  | CCGAATGGGG-AACTTTACTGA  | 18/81 (22.2%) | 60  | 2 | 1 | 14  |
| chr24 | 27308362 | pcsk9  | CCGAATGGGG-AACTTTACTGA  | 18/81 (22.2%) | 60  | 2 | 1 | 8   |
| chr17 | 26877631 | pcsk9  | GTCAGTAAAGTT-CCCATTCGG  | 19/81 (23.5%) | 65  | 2 | 1 | 6   |
| chr12 | 16562148 | pcsk9  | CCGAATGGGG-AACTTTACTGA  | 18/81 (22.2%) | 60  | 2 | 1 | 6   |
| chr20 | 11843066 | pcsk9  | CCGAATGGGG-AACTTTACTGA  | 18/81 (22.2%) | 60  | 2 | 1 | 4   |
| chr5  | 9624697  | sh2b3  | CCGCCATGGATTCCAGCGTCCC  | 22/80 (27.5%) | 108 | 0 | 0 | 49  |
| chr15 | 31598137 | sh2b3  | GGGAGCGCAGGAATCCATGGATG | 20/80 (25.0%) | 90  | 2 | 0 | 34  |
| chr10 | 20539546 | sh2b3  | CTAAACTGGAATCAATGGAGG   | 16/80 (20.0%) | 54  | 6 | 0 | 10  |
| chr10 | 15269480 | vldlr  | GAGCAGTCTCAGTTCCAGTGTGG | 22/80 (27.5%) | 108 | 0 | 0 | 22  |
| chr5  | 3544150  | ywhaqa | GTGCCTACAAGAACGTAGTGGG  | 19/80 (23.8%) | 81  | 3 | 0 | 167 |
| chr20 | 29566888 | ywhaqa | GTCGCCTACAAGAACGTGGTGGG | 21/80 (26.2%) | 99  | 1 | 0 | 73  |
| chr17 | 32503336 | ywhaqa | GTTGCCTATAAGAACGTGGTGGG | 19/80 (23.8%) | 81  | 3 | 0 | 61  |
| chr6  | 52216272 | ywhaqa | GTGCCTACAAGAATGTGGTAGG  | 19/80 (23.8%) | 81  | 3 | 0 | 28  |
| chr16 | 24684272 | ywhaqa | GTGCCTACAAGAACGTGGTGGG  | 19/80 (23.8%) | 81  | 3 | 0 | 27  |
| chr10 | 17168042 | ywhaqa | CCCACCACATTCTGTAGGCCAC  | 19/80 (23.8%) | 81  | 3 | 0 | 18  |
| chr19 | 12188165 | ywhaqa | CCCACCACATTCTGTAGGCCAC  | 19/80 (23.8%) | 81  | 3 | 0 | 18  |
| chr21 | 34112498 | ywhaqa | CCAACCACGTTCTTGAGGCCCA  | 19/80 (23.8%) | 81  | 3 | 0 | 14  |

**Supplementary Table S3.** Information about all zebrafish samples examined in this study

| Sample # | Sample ID | Gene targeted | Generation | Age    | Fish per sample |
|----------|-----------|---------------|------------|--------|-----------------|
| 1        | F01p1_1   | ldlra         | F0         | 10 dpf | 30              |
| 2        | F01p1_2   | ldlra         | F0         | 10 dpf | 30              |
| 3        | F01p2_1   | nbeal2        | F0         | 10 dpf | 25              |
| 4        | F01p3_1   | sh2b3         | F0         | 10 dpf | 30              |
| 5        | F01p3_2   | sh2b3         | F0         | 10 dpf | 30              |
| 6        | F01p4_1   | ywhaqa        | F0         | 10 dpf | 30              |
| 7        | F01p4_2   | ywhaqa        | F0         | 10 dpf | 1               |
| 8        | F01s3_1   | sh2b3         | F0         | adult  | 1               |
| 9        | F01s3_2   | sh2b3         | F0         | adult  | 1               |
| 10       | F01s3_4   | sh2b3         | F0         | adult  | 1               |
| 11       | F01s3_5   | sh2b3         | F0         | adult  | 1               |
| 12       | F01s3_8   | sh2b3         | F0         | adult  | 1               |
| 13       | F01s3_9   | sh2b3         | F0         | adult  | 1               |
| 14       | F01s3_11  | sh2b3         | F0         | adult  | 1               |
| 15       | F01s3_12  | sh2b3         | F0         | adult  | 1               |
| 16       | F01s3_13  | sh2b3         | F0         | adult  | 1               |
| 17       | F01s3_15  | sh2b3         | F0         | adult  | 1               |
| 18       | F01s3_16  | sh2b3         | F0         | adult  | 1               |
| 19       | F01s4_1   | ywhaqa        | F0         | adult  | 1               |
| 20       | F01s4_2   | ywhaqa        | F0         | adult  | 1               |
| 21       | F01s4_3   | ywhaqa        | F0         | adult  | 1               |
| 22       | F01s4_4   | ywhaqa        | F0         | adult  | 1               |
| 23       | F01s4_5   | ywhaqa        | F0         | adult  | 1               |
| 24       | F01s4_6   | ywhaqa        | F0         | adult  | 1               |
| 25       | F01s4_7   | ywhaqa        | F0         | adult  | 1               |
| 26       | F01s4_8   | ywhaqa        | F0         | adult  | 1               |
| 27       | F01s4_9   | ywhaqa        | F0         | adult  | 1               |
| 28       | F01s4_10  | ywhaqa        | F0         | adult  | 1               |
| 29       | F01s4_11  | ywhaqa        | F0         | adult  | 1               |
| 30       | F01s4_12  | ywhaqa        | F0         | adult  | 1               |
| 31       | F01s4_14  | ywhaqa        | F0         | adult  | 1               |
| 32       | F01s4_15  | ywhaqa        | F0         | adult  | 1               |
| 33       | F01s4_16  | ywhaqa        | F0         | adult  | 1               |
| 34       | F03p1_1   | ldlra         | F0         | 5 dpf  | 30              |
| 35       | F03p1_2   | ldlra         | F0         | 5 dpf  | 30              |
| 36       | F03p1_3   | ldlra         | F0         | 5 dpf  | 30              |
| 37       | F03p2_1   | nbeal2        | F0         | 5 dpf  | 30              |
| 38       | F03p2_2   | nbeal2        | F0         | 5 dpf  | 30              |
| 39       | F03p2_3   | nbeal2        | F0         | 5 dpf  | 30              |
| 40       | F03p3_1   | sh2b3         | F0         | 5 dpf  | 30              |
| 41       | F03p3_2   | sh2b3         | F0         | 5 dpf  | 30              |
| 42       | F03p3_3   | sh2b3         | F0         | 5 dpf  | 30              |
| 43       | F03p4_1   | ywhaqa        | F0         | 5 dpf  | 30              |
| 44       | F03p4_2   | ywhaqa        | F0         | 5 dpf  | 30              |
| 45       | F03p4_3   | ywhaqa        | F0         | 5 dpf  | 30              |
| 46       | F12p3_1   | sh2b3         | F1         | 5 dpf  | 30              |
| 47       | F12p3_2   | sh2b3         | F1         | 5 dpf  | 30              |
| 48       | F12p3_3   | sh2b3         | F1         | 5 dpf  | 30              |
| 49       | F12p3_4   | sh2b3         | F1         | 5 dpf  | 30              |

|     |          |        |    |          |    |
|-----|----------|--------|----|----------|----|
| 50  | F12p3_5  | sh2b3  | F1 | 5 dpf    | 30 |
| 51  | F12p3_6  | sh2b3  | F1 | 5 dpf    | 30 |
| 52  | F12p3_7  | sh2b3  | F1 | 5 dpf    | 30 |
| 53  | F12p4_1  | ywhaqa | F1 | 5 dpf    | 30 |
| 54  | F12p4_2  | ywhaqa | F1 | 5 dpf    | 30 |
| 55  | F12p4_3  | ywhaqa | F1 | 5 dpf    | 30 |
| 56  | F12p4_4  | ywhaqa | F1 | 5 dpf    | 30 |
| 57  | F12p4_5  | ywhaqa | F1 | 5 dpf    | 30 |
| 58  | F12p4_6  | ywhaqa | F1 | 5 dpf    | 30 |
| 59  | F12p4_7  | ywhaqa | F1 | 5 dpf    | 30 |
| 60  | F12p4_8  | ywhaqa | F1 | 5 dpf    | 30 |
| 61  | F12p4_9  | ywhaqa | F1 | 5 dpf    | 30 |
| 62  | F12s3_1  | sh2b3  | F1 | juvenile | 1  |
| 63  | F12s3_2  | sh2b3  | F1 | juvenile | 1  |
| 64  | F12s3_3  | sh2b3  | F1 | juvenile | 1  |
| 65  | F12s3_4  | sh2b3  | F1 | juvenile | 1  |
| 66  | F12s3_5  | sh2b3  | F1 | juvenile | 1  |
| 67  | F12s3_6  | sh2b3  | F1 | juvenile | 1  |
| 68  | F12s3_7  | sh2b3  | F1 | juvenile | 1  |
| 69  | F12s3_8  | sh2b3  | F1 | juvenile | 1  |
| 70  | F12s3_9  | sh2b3  | F1 | juvenile | 1  |
| 71  | F12s3_10 | sh2b3  | F1 | juvenile | 1  |
| 72  | F12s3_11 | sh2b3  | F1 | juvenile | 1  |
| 73  | F12s3_12 | sh2b3  | F1 | juvenile | 1  |
| 74  | F12s3_13 | sh2b3  | F1 | juvenile | 1  |
| 75  | F12s3_14 | sh2b3  | F1 | juvenile | 1  |
| 76  | F12s3_15 | sh2b3  | F1 | juvenile | 1  |
| 77  | F12s3_16 | sh2b3  | F1 | juvenile | 1  |
| 78  | F12s3_17 | sh2b3  | F1 | juvenile | 1  |
| 79  | F12s3_18 | sh2b3  | F1 | juvenile | 1  |
| 80  | F12s3_19 | sh2b3  | F1 | juvenile | 1  |
| 81  | F12s3_20 | sh2b3  | F1 | juvenile | 1  |
| 82  | F12s3_21 | sh2b3  | F1 | juvenile | 1  |
| 83  | F12s3_22 | sh2b3  | F1 | juvenile | 1  |
| 84  | F12s4_1  | ywhaqa | F1 | juvenile | 1  |
| 85  | F12s4_2  | ywhaqa | F1 | juvenile | 1  |
| 86  | F12s4_3  | ywhaqa | F1 | juvenile | 1  |
| 87  | F12s4_4  | ywhaqa | F1 | juvenile | 1  |
| 88  | F12s4_5  | ywhaqa | F1 | juvenile | 1  |
| 89  | F12s4_6  | ywhaqa | F1 | juvenile | 1  |
| 90  | F12s4_7  | ywhaqa | F1 | juvenile | 1  |
| 91  | F12s4_8  | ywhaqa | F1 | juvenile | 1  |
| 92  | F12s4_9  | ywhaqa | F1 | juvenile | 1  |
| 93  | F12s4_10 | ywhaqa | F1 | juvenile | 1  |
| 94  | F12s4_11 | ywhaqa | F1 | juvenile | 1  |
| 95  | F12s4_12 | ywhaqa | F1 | juvenile | 1  |
| 96  | F12s4_13 | ywhaqa | F1 | juvenile | 1  |
| 97  | F12s4_14 | ywhaqa | F1 | juvenile | 1  |
| 98  | F12s4_15 | ywhaqa | F1 | juvenile | 1  |
| 99  | F12s4_16 | ywhaqa | F1 | juvenile | 1  |
| 100 | F12s4_17 | ywhaqa | F1 | juvenile | 1  |
| 101 | F12s4_18 | ywhaqa | F1 | juvenile | 1  |
| 102 | F12s4_19 | ywhaqa | F1 | juvenile | 1  |
| 103 | F12s4_20 | ywhaqa | F1 | juvenile | 1  |



|     |           |            |    |          |    |
|-----|-----------|------------|----|----------|----|
| 104 | F12s4_21  | ywhaqa     | F1 | juvenile | 1  |
| 105 | F12s4_22  | ywhaqa     | F1 | juvenile | 1  |
| 106 | F12s4_23  | ywhaqa     | F1 | juvenile | 1  |
| 107 | F12s4_24  | ywhaqa     | F1 | juvenile | 1  |
| 108 | F01wt_01  | uninjected | F0 | 10 dpf   | 30 |
| 109 | wtFO_1-5A | uninjected | F0 | juvenile | 5  |

**Supplementary Table S4.** Primer information for long-read amplicon re-sequencing of on- and off-target sites

| ID                   | Forward primer          | Reverse Primer          | Forward primer              | Reverse Primer              | Expected size (bp) |
|----------------------|-------------------------|-------------------------|-----------------------------|-----------------------------|--------------------|
| ldlra on-target      | GGACTGATCTGCCTCTGAATG   | CACTTCCAGCTACCGTGTATG   | chr3:19,302,116-19,302,136  | chr3:19,308,406-19,308,426  | 6290               |
| ldlra off-target 1   | TGGAGGTCTGGTTGCTCTAA    | GTGTATGGAGAGAGATGGGTTG  | chr23:8,186,939-8,186,958   | chr23:8,192,392-8,192,412   | 5453               |
| ldlra off-target 2   | ACGCACACATACCAGTCATC    | CACACAGCTAACCAACCTACA   | chr16:9,327,571-9,327,590   | chr16:9,333,214-9,333,234   | 5664               |
| ldlra off-target 3   | CCAGAGTAATTGGCAGGTCTAC  | GATCGAGCACGCTGTTCTTA    | chr10:36,348,775-36,348,796 | chr10:36,354,172-36,354,191 | 5417               |
| ldlra off-target 4   | TCTGCGTGTGAGAGATTGTATG  | GCTACCCTTGGTGGTGTAAA    | chr19:25,974,714-25,974,735 | chr19:25,980,375-25,980,394 | 5661               |
| ldlra off-target 5   | AACAGACGAGCAGTTGGTATAG  | CATAGTAGCCGAGAGGTGTTTC  | chr24:7,923,642-7,923,663   | chr24:7,926,264-7,926,285   | 2622               |
| nbeal2 on-target     | GAGATGGGTGAATGGAAGGATAA | TCTTGGATGACCTAAGGGTAGA  | chr16:16,474,916-16,474,938 | chr16:16,481,105-16,481,126 | 6211               |
| nbeal2 off-target 1  | CGATGGTAGGTGGGTTTCTATC  | GGTGAATGGCGCAGTTTATTT   | chr12:24,369,712-24,369,733 | chr12:24,375,091-24,375,111 | 5400               |
| nbeal2 off-target 2  | CCTACTCTCTGCCCAAGATAAAG | CGGCTTCAACCACAACATTC    | chr8:47,071,177-47,071,199  | chr8:47,076,345-47,076,364  | 5188               |
| nbeal2 off-target 3  | TCAGCATAGCAGCAGCATAG    | CTCGGTAGGTCAACACAAGTAG  | chr14:16,381,452-16,381,471 | chr14:16,386,500-16,386,521 | 5070               |
| nbeal2 off-target 6  | CCCGCTTGCTCTTCATATT     | CAGAGTGTAGGTTGGCCATTT   | chr18:14,201,917-14,201,936 | chr18:14,208,077-14,208,097 | 6181               |
| nbeal2 off-target 7  | CAGAGCCTGAGATGGAAGATATG | GATGTGTCGTACGGGTCAAA    | chr10:1,888,407-1,888,429   | chr10:1,893,485-1,893,504   | 5098               |
| nbeal2 off-target 8  | GCTACAACTCTGTCTCCTCTTC  | GCGAGTAATGGTTCCTGTAAC   | chr3:35,682,090-35,682,112  | chr3:35,687,058-35,687,079  | 4990               |
| nbeal2 off-target 9  | GTCACAAGCCCTCCACTAAA    | GCTCCTCTCACTCAGGATTAAC  | chr20:24,395,348-24,395,367 | chr20:24,400,556-24,400,577 | 5230               |
| nbeal2 off-target 10 | GCAACTCTCGAGTCACTTTCT   | AGCGGTTATGGTCGCATTAT    | chr6:23,358,162-23,358,182  | chr6:23,364,462-23,364,481  | 6320               |
| nbeal2 off-target 11 | GCCTGTGCTCATACGATTCT    | CACTGTAAGCCTCTGACACTATT | chr14:11,137,744-11,137,763 | chr14:11,143,443-11,143,465 | 5722               |
| nbeal2 off-target 12 | GCGACCCAGAAGTCTCTTTAC   | CCTTCGCTCTCTTTTCATCTC   | chr18:30,357,214-30,357,234 | chr18:30,362,099-30,362,120 | 4907               |
| sh2b3 on-target      | GAGATCCGAACTGCTGGATTA   | GTTTGGCTTGCTGAGCTTATG   | chr5:9,621,342-9,621,363    | chr5:9,626,092-9,626,112    | 4771               |
| sh2b3 off-target 1   | CTCTTGCTATTTCCGGCTAGTG  | GTGTCGTGATGTCTGTCTTGG   | chr15:31,594,333-31,594,354 | chr15:31,601,209-31,601,230 | 6898               |
| sh2b3 off-target 2   | GCAGAACCTCGTGATGTCTATC  | CGCTGGTCCACTTCTCAATTA   | chr10:20,536,920-20,536,941 | chr10:20,543,191-20,543,211 | 6292               |

|                     |                         |                        |                             |                             |      |
|---------------------|-------------------------|------------------------|-----------------------------|-----------------------------|------|
| ywhaqa on-target    | CTCTTTCCGCTCCCTATGAATG  | GTGATGAGGTGCCAAGCTATAA | chr20:29,564,081-29,564,102 | chr20:29,570,097-29,570,118 | 6038 |
| ywhaqa off-target 1 | TTCACGCTACCTCTGTTCTTG   | CGTGCAGCCCTATAGTTCTAAT | chr5:3,540,188-3,540,208    | chr5:3,547,891-3,547,912    | 7703 |
| ywhaqa off-target 2 | CATCGGTGTGCTAAACTGAAATG | GTCTCTCTGCGAACAAGGTAAA | chr17:32,501,047-32,501,069 | chr17:32,506,771-32,506,792 | 5746 |
| ywhaqa off-target 3 | GAAGTGGTACTGCCCTGAATAC  | TGCGTCGACACAACCTAATC   | chr6:52,212,611-52,212,632  | chr6:52,219,045-52,219,064  | 6454 |
| ywhaqa off-target 4 | CGACACTCAGGTAAGAGAACAC  | AGGACCAGAAGATGAAGGTAGA | chr16:24,681,274-24,681,295 | chr16:24,685,847-24,685,867 | 4594 |
| ywhaqa off-target 5 | GACCTCATCATTGGCCCTAAA   | GCAGAAGCACTGCAACATAAA  | chr10:17,165,822-17,165,842 | chr10:17,170,415-17,170,435 | 4614 |
| ywhaqa off-target 6 | TTACTCGTCCCAACTGCTATTT  | GGTCTGGGATACGGTTTGTT   | chr19:12,184,966-12,184,987 | chr19:12,190,849-12,190,868 | 5903 |
| ywhaqa off-target 7 | GGCCAAAGATGGAGGATATGAG  | GCGTAGAGCGCGATAGTTAAT  | chr21:34,109,119-34,109,140 | chr21:34,115,564-34,115,584 | 6466 |

**Supplementary Table S5.** Distinct CRISPR-Cas9 alleles detected at *sh2b3* on-target, both in F1 individuals and F1 larvae pools, obtained from *sh2b3* founder pair #1.

| Allele | Variant   | Del size (bp) | Ins size (bp) |
|--------|-----------|---------------|---------------|
| 1      | INSERTION | 0             | 8             |
| 2      | DELINS    | 3             | 6             |
| 3      | DELETION  | 5             | 0             |
| 4      | DELINS    | 6             | 5             |
| 5      | DELETION  | 9             | 0             |

**Supplementary Table S6.** Distinct CRISPR-Cas9 alleles detected at *sh2b3* on-target, both in F1 individuals and F1 larvae pools, obtained from *sh2b3* founder pair #2.

| Allele | Variant  | Del size (bp) | Ins size (bp) |
|--------|----------|---------------|---------------|
| 1      | DELETION | 6             | 0             |
| 2      | DELETION | 11            | 0             |
| 3      | DELINS   | 1             | 5             |
| 4      | DELINS   | 15            | 6             |

**Supplementary Table S7.** Distinct CRISPR-Cas9 alleles detected at *sh2b3* on-target, both in F1 individuals and F1 larvae pools, obtained from *sh2b3* founder pair #3.

| Allele | Variant  | Del size (bp) | Ins size (bp) |
|--------|----------|---------------|---------------|
| 1      | DELETION | 6             | 0             |
| 2      | DELETION | 12            | 0             |
| 3      | DELETION | 10            | 0             |
| 4      | DELINS   | 2             | 9             |
| 5      | DELETION | 9             | 0             |

**Supplementary Table S8.** Distinct CRISPR-Cas9 alleles detected at *ywhaqa* on-target, both in F1 individuals and F1 larvae pools, obtained from *ywhaqa* founder pair #1.

| Allele | Variant   | Del size (bp) | Ins size (bp) |
|--------|-----------|---------------|---------------|
| 1      | INSERTION | 0             | 2             |
| 2      | DELETION  | 21            | 0             |
| 3      | DELETION  | 2             | 0             |
| 4      | DELETION  | 6             | 0             |

**Supplementary Table S9.** Distinct CRISPR-Cas9 alleles detected at *ywhaqa* on-target, both in F1 individuals and F1 larvae pools, obtained from *ywhaqa* founder pair #2.

| Allele | Variant   | Del size (bp) | Ins size (bp) |
|--------|-----------|---------------|---------------|
| 1      | INSERTION | 0             | 4             |
| 2      | DELETION  | 3             | 0             |
| 3      | DELINS    | 1             | 292           |
| 4      | DELETION  | 6             | 0             |
| 5      | DELETION  | 13            | 0             |
| 6      | DELINS    | 381           | 22            |

**Supplementary Table S10.** Distinct CRISPR-Cas9 alleles detected at *ywhaqa* on-target, in F1 individuals and F1 larvae pools, obtained from *ywhaqa* founder pair #4.

| Allele* | Variant | Del size (bp) | Ins size (bp) |
|---------|---------|---------------|---------------|
| 1       | DEL     | 6             | 0             |
| 2       | DELINS  | 4             | 6             |

\*Only one F1 larvae pool was available for this founding pair

**Supplementary Table S11.** List of off-target events and large SVs in the F1 individuals, which are validated in F1 zebrafish larvae pools obtained from the same mating pair.

| Site                | Sample   | Variant     | Freq      | Mating pair | Matched pools             | Validated in IGV | Validated in pool |
|---------------------|----------|-------------|-----------|-------------|---------------------------|------------------|-------------------|
| sh2b3 on-target     | F12s3_7  | 1053 bp del | 0.9728261 | pair 3      | F12p3_3, F12p3_4, F12p3_6 | YES              | YES               |
| sh2b3 off-target 1  | F12s3_1  | 8 bp del    | 0.7214854 | pair 2      | F12p3_7                   | YES              | YES               |
| sh2b3 off-target 1  | F12s3_4  | 8 bp del    | 0.7152445 | pair 2      | F12p3_7                   | YES              | YES               |
| sh2b3 off-target 1  | F12s3_5  | 8 bp del    | 0.7163842 | pair 2      | F12p3_7                   | YES              | YES               |
| sh2b3 off-target 1  | F12s3_7  | 5 bp ins    | 0.5784615 | pair 3      | F12p3_3, F12p3_4, F12p3_6 | YES              | YES               |
| sh2b3 off-target 1  | F12s3_9  | 8 bp del    | 0.7235974 | pair 2      | F12p3_7                   | YES              | YES               |
| sh2b3 off-target 1  | F12s3_10 | 8 bp del    | 0.7313567 | pair 2      | F12p3_7                   | YES              | YES               |
| ywhaqa on-target    | F12s4_20 | 292 bp ins  | 0.8678611 | pair 2      | F12p4_4, F12p4_5, F12p4_6 | YES              | YES               |
| ywhaqa on-target    | F12s4_22 | 292 bp ins  | 0.9976162 | pair 2      | F12p4_4, F12p4_5, F12p4_6 | YES              | YES               |
| ywhaqa on-target    | F12s4_23 | 292 bp ins  | 0.9773414 | pair 2      | F12p4_4, F12p4_5, F12p4_6 | YES              | YES               |
| ywhaqa off-target 2 | F12s4_9  | 2 bp del    | 0.2772384 | pair 4      | F12p4_9                   | YES              | YES               |
| ywhaqa off-target 2 | F12s4_17 | 3 bp del    | 0.8082902 | pair 2      | F12p4_4, F12p4_5, F12p4_6 | YES              | YES               |
| ywhaqa off-target 2 | F12s4_20 | 3 bp del    | 0.6814159 | pair 2      | F12p4_4, F12p4_5, F12p4_6 | YES              | YES               |
| ywhaqa off-target 2 | F12s4_21 | 3 bp del    | 0.8082139 | pair 2      | F12p4_4, F12p4_5, F12p4_6 | YES              | YES               |
| ywhaqa off-target 2 | F12s4_23 | 3 bp del    | 0.8852459 | pair 2      | F12p4_4, F12p4_5, F12p4_6 | YES              | YES               |
| ywhaqa off-target 2 | F12s4_24 | 3 bp del    | 0.4630463 | pair 2      | F12p4_4, F12p4_5, F12p4_6 | YES              | YES               |

**Supplementary Table S12.** List of on-target editing events in F1 individuals that are seemingly homozygous and where one single allele is reported in >98% of the sequencing reads.

| Site             | Sample name | Mating pair | Variant  | Del size | Ins size | Validated in IGV |
|------------------|-------------|-------------|----------|----------|----------|------------------|
| sh2b3 on-target  | F12s3_18    | pair 1      | DELINS   | 6        | 5        | YES              |
| ywhaqa on-target | F12s4_8     | pair 4      | DELINS   | 4        | 6        | YES              |
| ywhaqa on-target | F12s4_9     | pair 4      | DELINS   | 4        | 6        | YES              |
| ywhaqa on-target | F12s4_12    | pair 4      | DELINS   | 4        | 6        | YES              |
| ywhaqa on-target | F12s4_16    | pair 1      | DELETION | 6        | 0        | YES              |
| ywhaqa on-target | F12s4_17    | pair 2      | DELETION | 3        | 0        | YES              |
| ywhaqa on-target | F12s4_18    | pair 2      | DELETION | 6        | 0        | YES              |
